# Supplementary material for: pH-responsive iron-loaded carbonaceous nanoparticles for chemodynamic therapy based on the Fenton reaction
Source: Royal Society of Chemistry journal article supplement (doi:10.1039/d3tb02875e), 2024-01-01
Supplement: d3tb02875e1.pdf [file d3tb02875e1.pdf]

*Supporting Information*

**pH-Responsive iron-loaded carbonaceous nanoparticles with  
chemodynamic therapy based on Fenton reaction**

Nianlu Li <sup>a,c,1</sup> Gaorui Zhang <sup>b,d,1</sup>, Jinhua Zhan <sup>a,\*</sup>, Dexin Yu <sup>b,d,\*</sup>

a School of Chemistry and Chemical Engineering, Shandong University, Jinan, 250100,  
China

b Department of Radiology, Qilu Hospital of Shandong University, Jinan, Shandong,  
250012, China

c Physical and Chemical Laboratory, Shandong Academy of Occupational Health and  
Occupational Medicine, Shandong First Medical University & Shandong Academy of  
Medical Sciences, Jinan, 250000, China

d Translational Medicine Research Center in Nano Molecular and Functional Imaging  
of Shandong University, Jinan, 250100, China

\* Corresponding author.

E-mail addresses: jhzhan@sdu.edu.cn (Jinhua Zhan), yudexin0330@sina.com (Dexin.  
Yu)

<sup>1</sup> These authors contributed equally to this work.

## ***Experiment section***

### ***The determination of Fe loading on CNPs***

To determine the Fe loading on CNPs, ICP-MS was used to test the amount of Fe. First, a certain amount of dried CNPs were dispersed in 50 mL water under ultrasonication and a series of  $\text{FeCl}_2 \cdot 4\text{H}_2\text{O}$  were added. Then the final solutions were ultrasonicated for another 0.5 h and stirred for 12 h at room temperature. Finally, the obtained products of CNPs@Fe were washed with ethanol and water. The samples were acquired after dried and digested with nitric acid. The resulted solutions were collected for ICP-MS testing.

### ***The determination of CNPs number***

To determine the number of CNPs, fluorescein labeling is required. fluorescein-CNPs were prepared using the fluorescein isothiocyanate hydroxyl labeling method [1]. Briefly stated as follows: CNPs (0.1 g) were dissolved in dimethylsulfoxide (4 mL) under ultrasonic and then pyridine (5  $\mu\text{L}$ ) and fluorescein isothiocyanate isomer I (FITC) were added. Subsequently, dibutyltin dilaurate (2  $\mu\text{L}$ ) was added and the solution was placed at 95 °C for 2 h. The obtained results were centrifuged and washed. Finally, the precipitate was re-dispersed in water for dialysis to remove FITC. The final product was tested by flow cytometry.

### ***Preparation of $\text{Fe}_3\text{O}_4$***

L-Arginine (3.0 g) and  $\text{FeCl}_3 \cdot 6\text{H}_2\text{O}$  (0.5 g) were added to a component solvent containing water (10 mL) and glycerol (10 mL) under stirring. The solution was transferred into a 50 mL Teflonlined stainless steel autoclave and heated to 200 °C for 6 h. After the autoclave cooled to room temperature, the product was separated from the suspension by magnetic force and washed with water. Finally, the product was dried [2].

## **Reference**

[1] A.N. Belder DE, K. Granath. Preparation and properties of fluorescein-labelled dextrans. Carbohydrate Research. 30(2) (1973) 375-378.

[2] Y. Lai, W. Yin, J. Liu, R. Xi, J.Zhan. One-Pot Green Synthesis and Bioapplication of L-Arginine Capped Superparamagnetic Fe<sub>3</sub>O<sub>4</sub> Nanoparticles *Nanoscale Res Lett* 5 (2010) 302–307.

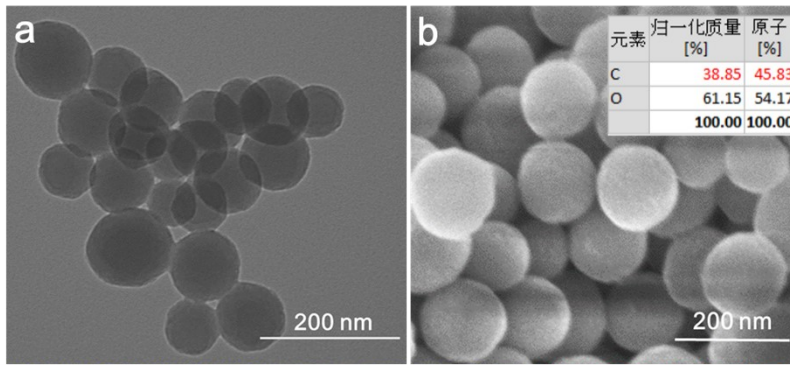

**Fig. S1.** (a) TEM of CNPs; (b) SEM of CNPs (insert is the content of C/O).

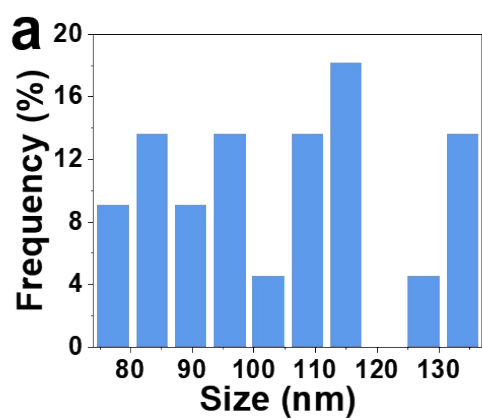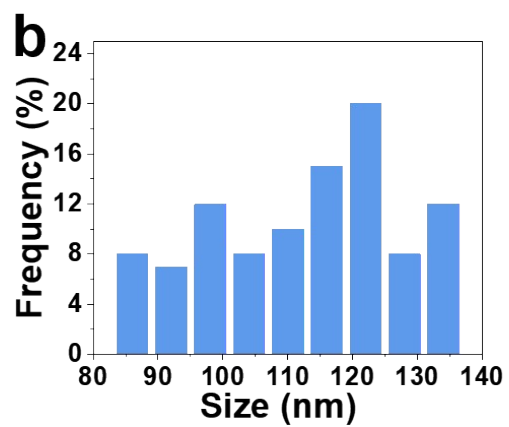

**Fig. S2.** Size distribution of CNPs@Fe calculated from Figs. 1a and 1b, respectively.

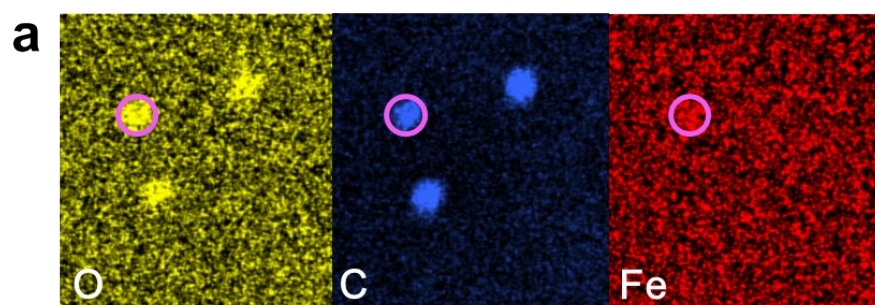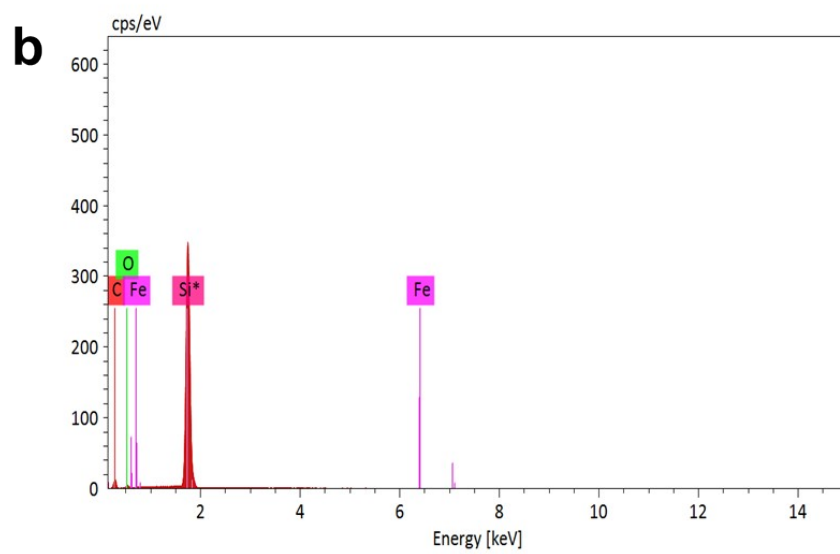

**Fig. S3.** (a) EDX elemental mapping of O, C, and Fe; (b) EDX spectroscopy of O, C, and Fe.

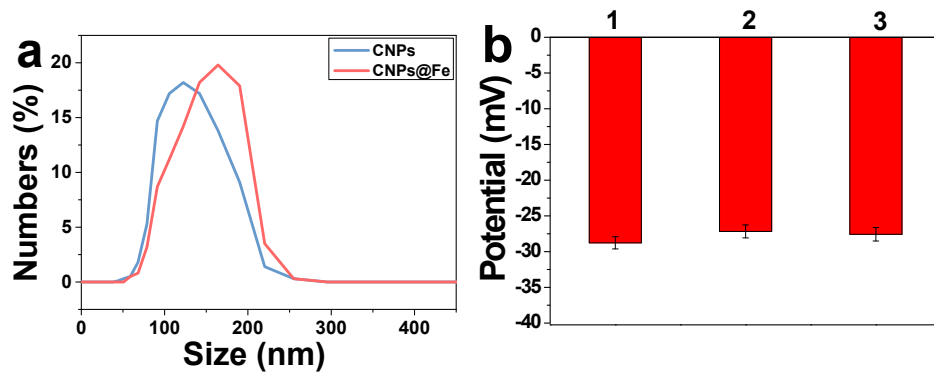

**Fig. S4.** (a) Hydrodynamic diameter distributions of CNPs and CNPs@Fe; (b)  $\zeta$  potential of (1) CNPs and (2) CNPs@Fe in HAC-NaAc (pH = 7.4), (3)  $\zeta$  potential of CNPs@Fe treated in HAC-NaAc (pH = 7.4) for 12 h.

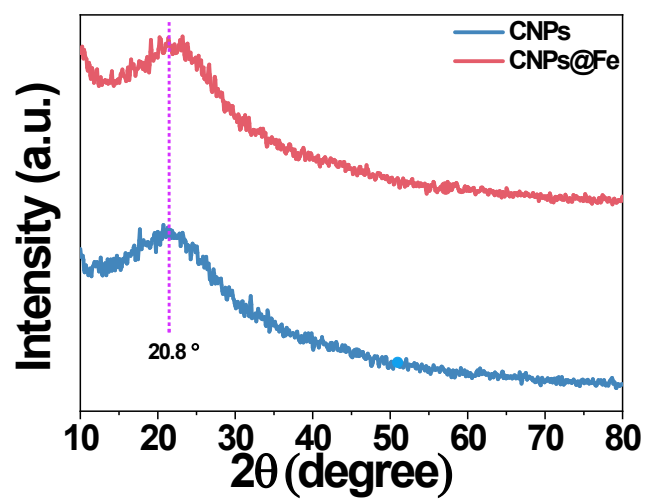

Fig. S5. XRD pattern of CNPs and CNPs@Fe.



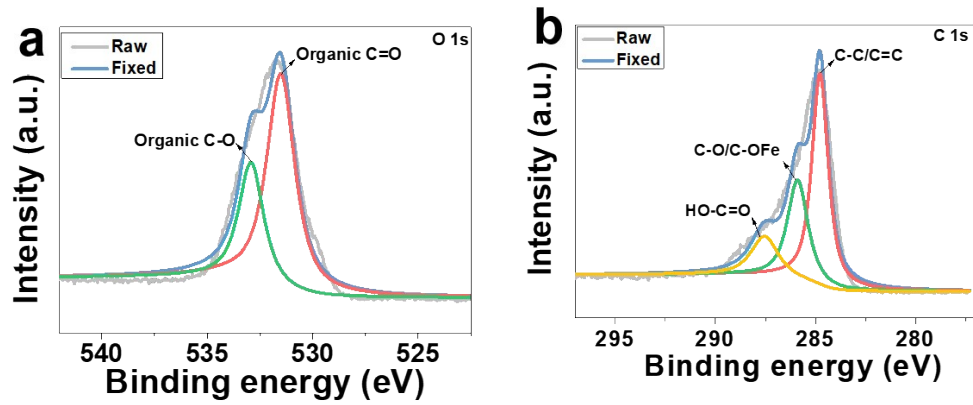

Fig. S6. XPS spectra of (a) O 1s and (b) C 1s.

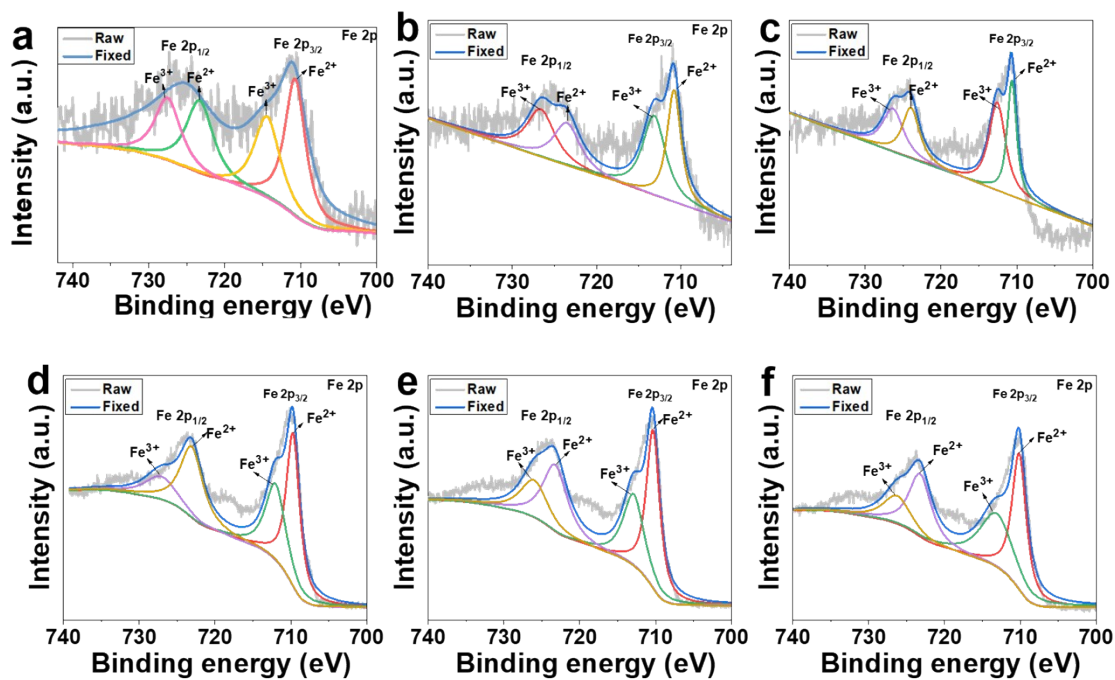

**Fig. S7.** XPS spectra of Fe 2p in CNPs@Fe (a) before used, (b) treated in pH 6.0, (c) treated in pH 5.0; XPS spectra of Fe 2p in Fe<sub>3</sub>O<sub>4</sub> (d) before used, (e) treated in pH 6.0, (f) treated in pH 5.0.

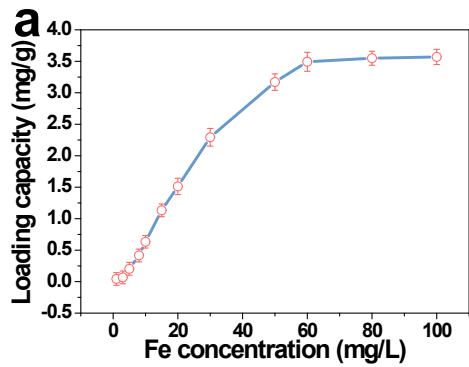

**Fig. S8.** (a) Fe loading capacity of CNPs at various concentrations of  $\text{Fe}^{2+}$ ; (b) Time dependent release of Fe from CNPs@Fe at different pH values.

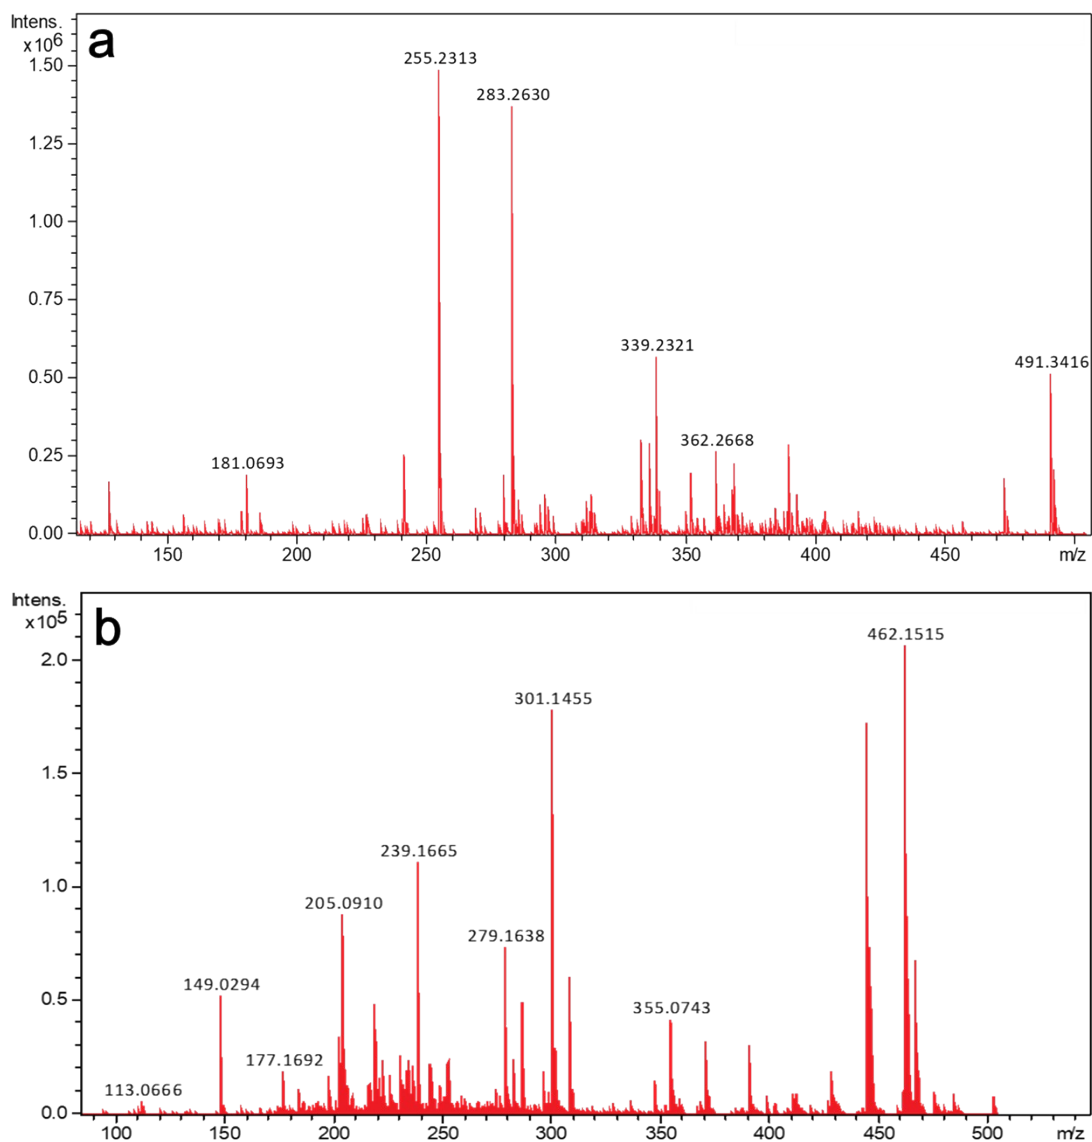

**Fig. S9.** Mass spectra of CNPs in the (a) negative ion mode and (b) positive ion mode using a direct infusion into a DART-TOF-MS instrument.

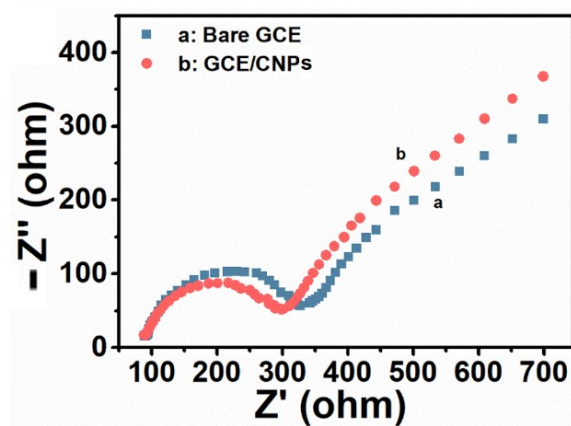

**Fig. S10.** Electrochemical impedance spectroscopy of the different electrodes in in 0.1 mol/L KCl containing 5 mmol/L  $[\text{Fe}(\text{CN})_6]^{3-/4-}$ . The frequency range is between 0.01 and 100,000 Hz with amplitude of 5 mV.

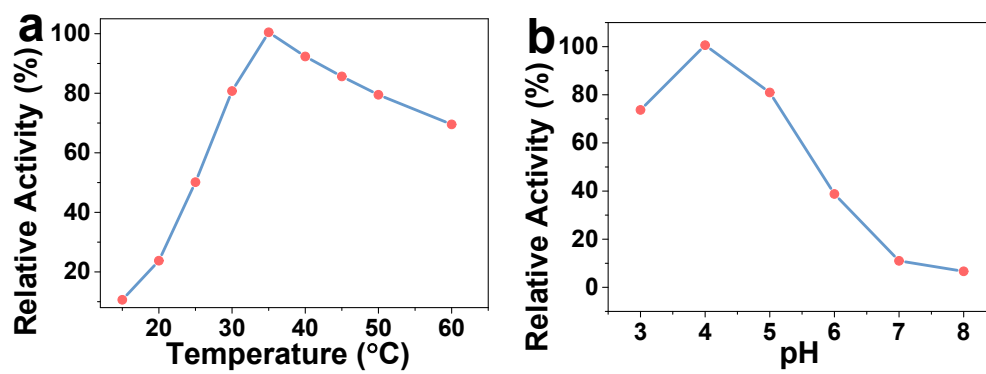

**Fig. S11.** Effects of (a) temperature at pH 4.0 and (b) pH at a temperature of 35 °C on catalytic activity of CNPs@Fe.

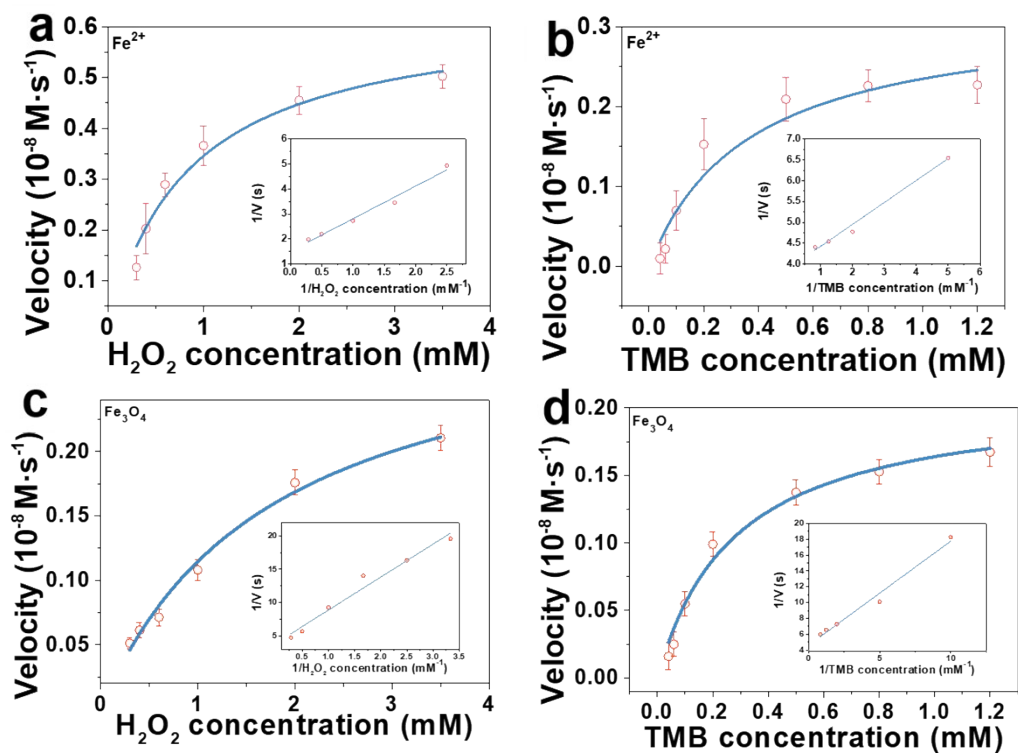

**Fig. S12.** Steady-state kinetic assay using  $\text{H}_2\text{O}_2$  and TMB as substrates, respectively. (Insert: Double-reciprocal plots). Conditions: 180 ppm of  $\text{Fe}^{2+}$  (a and b), 2.0 ppm of  $\text{Fe}_3\text{O}_4$  (c and d), HAC-NaAc buffer (0.01 M, pH 5.0), 35 °C.

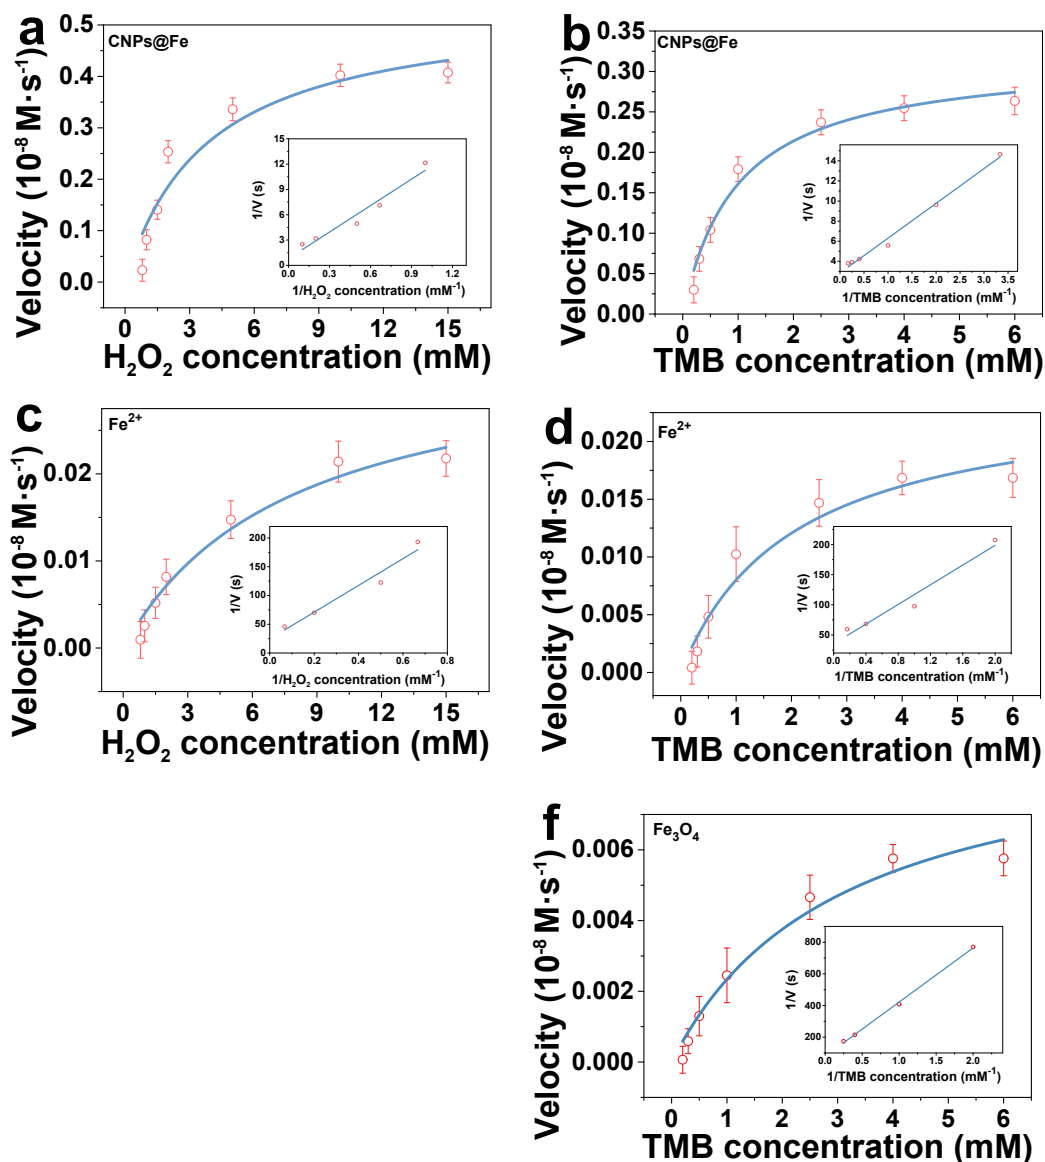

**Fig. S13.** Steady-state kinetic assay using  $\text{H}_2\text{O}_2$  and TMB as substrates, respectively. (Insert: Double-reciprocal plots). Conditions: 50  $\mu\text{g}/\text{mL}$  of CNPs@Fe (a and b), 180 ppm of  $\text{Fe}^{2+}$  (c and d), 2.0 ppm of  $\text{Fe}_3\text{O}_4$  (e and f). HAc-NaAc buffer (0.01 M, pH 6.0), 35  $^\circ\text{C}$ .



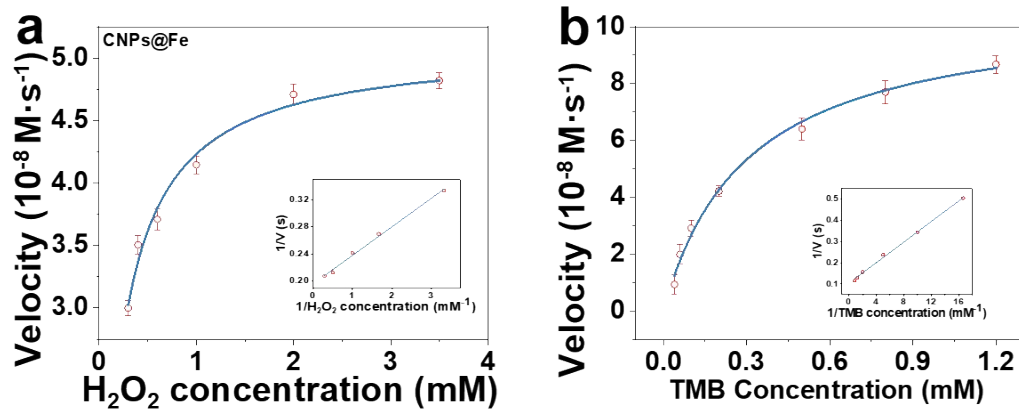

**Fig. S14.** Steady-state kinetic assay of CNPs@Fe (50  $\mu\text{g/mL}$ ) in HAc-NaAc buffer (0.01 M, pH 4.0) using (c)  $\text{H}_2\text{O}_2$  and (d) TMB as substrates, respectively. (Insert: Double-reciprocal plots).

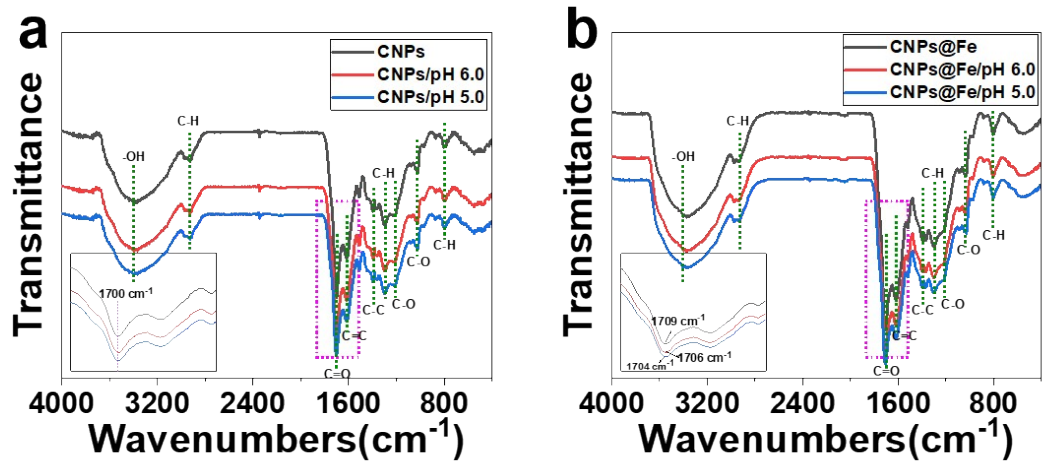

Fig. S15. FTIR spectra of (a) CNPs and (b) CNPs@Fe treated in different systems.

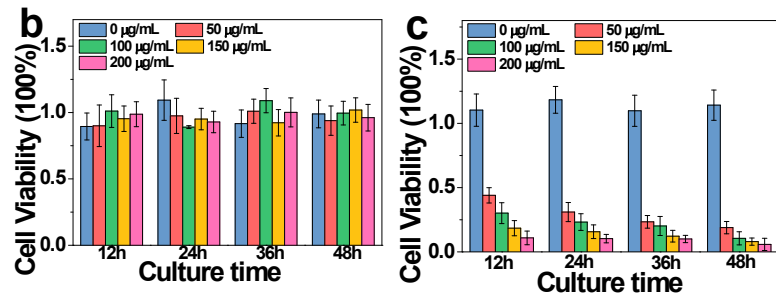

**Fig. S16.** (a) Effects of the concentrations of CNPs on PANC-02 cells viability at different time intervals. (b) Effects of the concentration of CNPs@Fe on hTERT-HPNE cells viability at different time intervals. (c) Effects of the concentrations CNPs@Fe on PANC-02 cells viability at different time intervals.

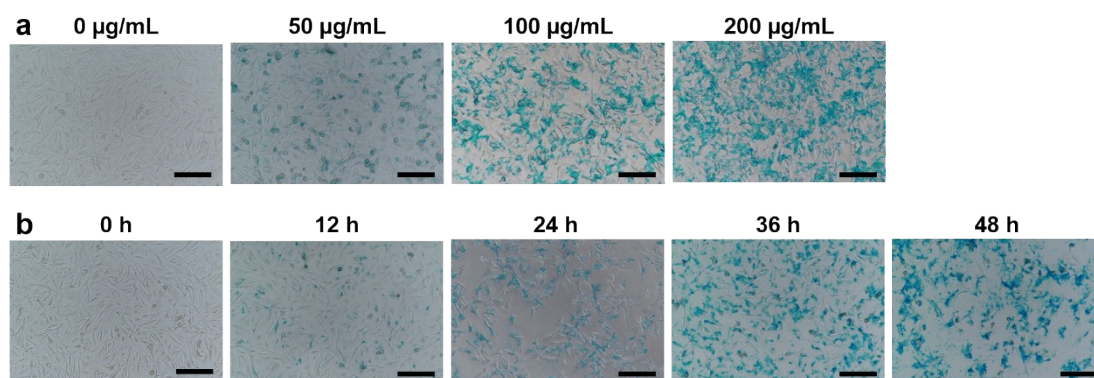

**Fig. S17.** Prussian blue staining of 4T1 cells after incubation (a) with different concentrations of CNPs@Fe and (b) for different time.

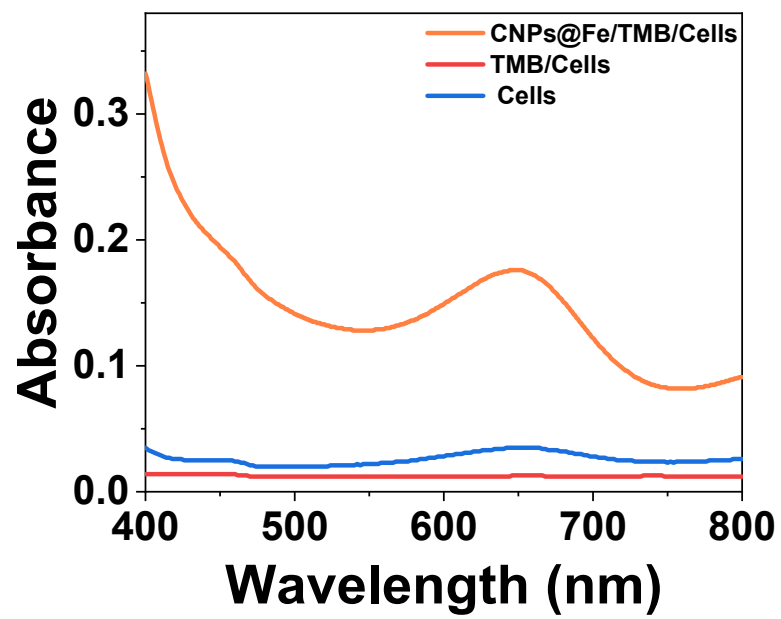

Fig. S18. The UV-vis absorption spectra of different systems.

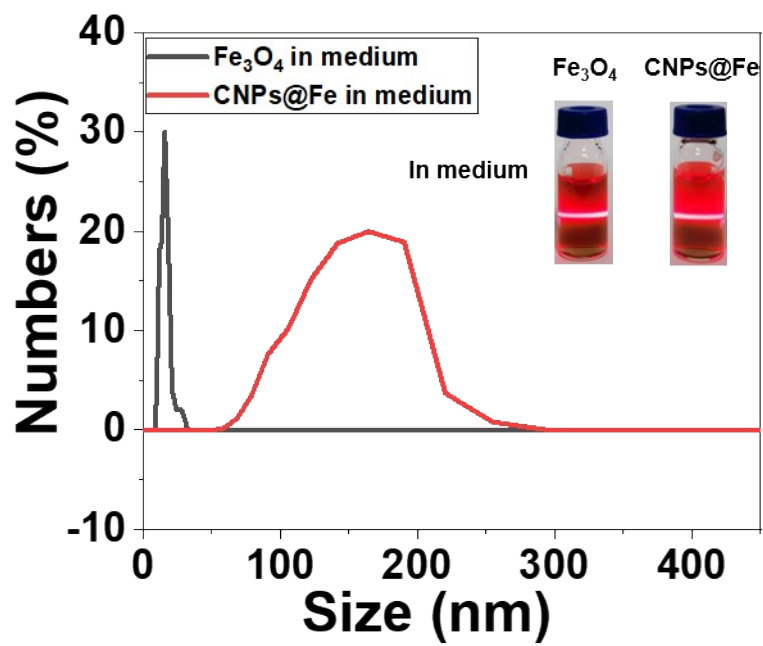

Fig. S19. Hydrodynamic diameter distributions of Fe<sub>3</sub>O<sub>4</sub> and CNPs@Fe (insert is the Tyndall effect of Fe<sub>3</sub>O<sub>4</sub> and CNPs@Fe ).

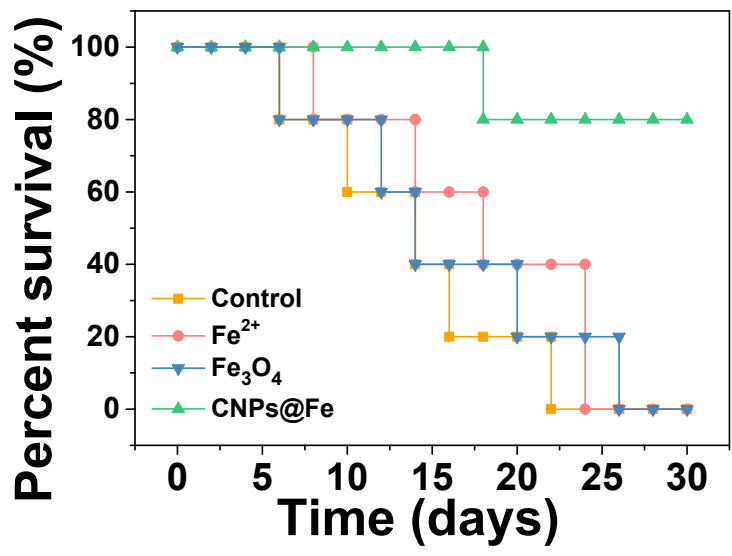

Fig. S20. Survival curves of 4T1 tumor-bearing mice in different groups.

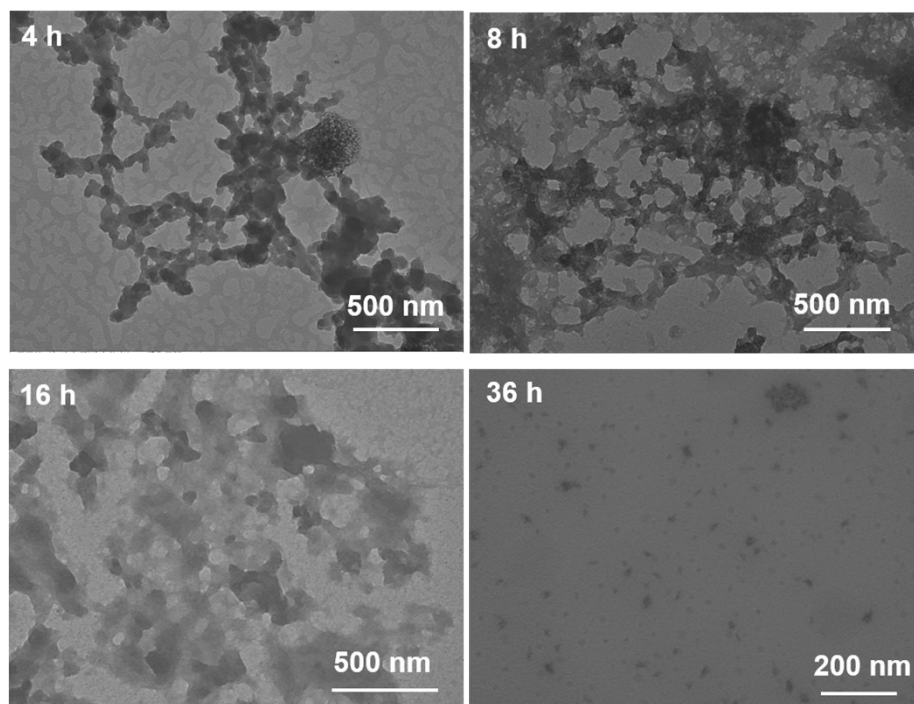

**Fig. S21** Time-dependent TEM images of CNPs@Fe after being soaked into enzyme.



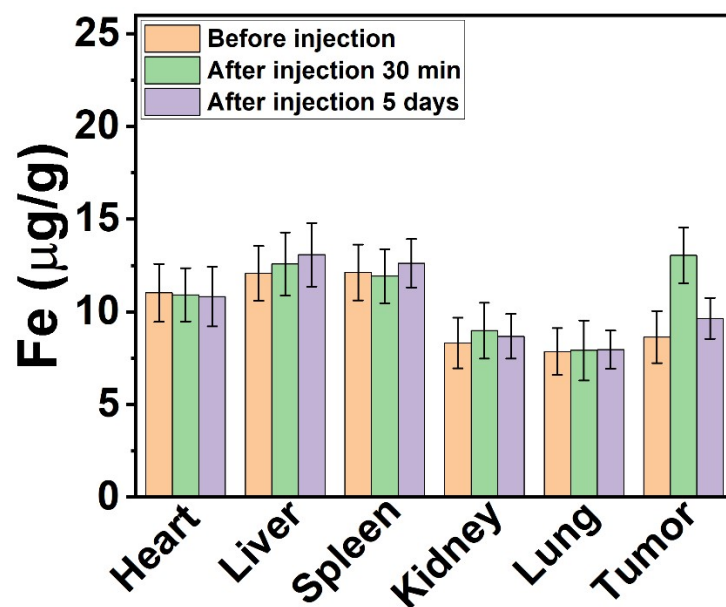

**Fig. S22.** Biodistribution of the levels of Fe element in major organs and tumors pre- and post-injection of CNPs@Fe.

**Table S1.** Comparison of the kinetic parameters of CNPs@Fe detected at pH 4.0 with other nanozymes.

| Catalyst                                            | Substrate                     | $K_m$ (mM)    | $V_{max}$ ( $10^{-8}$ M s $^{-1}$ ) | Reference |
|-----------------------------------------------------|-------------------------------|---------------|-------------------------------------|-----------|
| CNPs@Fe                                             | TMB                           | 0.303         | 11.7                                | This work |
|                                                     | H <sub>2</sub> O <sub>2</sub> | 0.206         | 5.11                                |           |
| Cu <sub>2-x</sub> Se                                | TMB                           | 0.532         | 2.05                                | 1         |
|                                                     | H <sub>2</sub> O <sub>2</sub> | 0.457         | 0.38                                |           |
| MoS <sub>2</sub> -Pt <sub>74</sub> Ag <sub>26</sub> | TMB                           | 25.71         | 7.29                                | 2         |
|                                                     | H <sub>2</sub> O <sub>2</sub> | 0.386         | 3.22                                |           |
| Fe <sub>3</sub> O <sub>4</sub> /N-GQDs              | TMB                           | 0.19          | 13.8                                | 3         |
|                                                     | H <sub>2</sub> O <sub>2</sub> | 1.02          | 2.76                                |           |
| MoS <sub>2</sub> (1100)<br>NSs                      | TMB                           | 2.6           | 6.7                                 | 4         |
|                                                     | H <sub>2</sub> O <sub>2</sub> | 0.016         | 8.3                                 |           |
| Cu-CN                                               | TMB                           | 0.26          | 1.98                                | 5         |
|                                                     | H <sub>2</sub> O <sub>2</sub> | 3.00          | 2.59                                |           |
| CuAsp                                               | TMB                           | 0.219 ± 0.009 | 4.138 ± 2.003                       | 6         |
|                                                     | H <sub>2</sub> O <sub>2</sub> | 8.173 ± 0.756 | 2.291 ± 0.047                       |           |

1. H. Ni, X. Li, G. Yan, C. Huang and H. Zou, *Sensors and Actuators B: Chemical*, 2024, **398**, 134794.
2. S. Cai, Q. Han, C. Qi, Z. Lian, X. Jia, R. Yang and C. Wang, *Nanoscale*, 2016, **8**, 3685-3693.
3. B. Shi, Y. Su, L. Zhang, M. Huang, X. Li and S. Zhao, *Nanoscale*, 2016, **8**, 10814-10822.
4. C. Xia, L. Xu, Z. Li and L. Guo, *Applied Surface Science*, 2023, **635**, 157777.
5. J. Liu, X. Wang, F. Ma, X. Yang, Y. Liu, X. Zhang, S. Guo, Z. Wang, S. Yang and R. Zhao, *Chemical Engineering Journal*, 2022, **435**, 134966.
6. L. Lei, D. Song, L. Fan, B. Liu, M. He, X. Sun, W. Xu, K. Tao, H. Huang and Y. Li, *Microchimica Acta*, 2022, **189**, 61.

**Table 2.** The ratio of Fe<sup>2+</sup>/Fe<sup>3+</sup> in CNPs@Fe and Fe<sub>3</sub>O<sub>4</sub>.

| CNPs@Fe | Relative Intensity Ratio<br>( Fe <sup>3+</sup> : Fe <sup>2+</sup> ) | Fe <sub>3</sub> O <sub>4</sub> | Relative Intensity Ratio<br>( Fe <sup>3+</sup> : Fe <sup>2+</sup> ) |
|---------|---------------------------------------------------------------------|--------------------------------|---------------------------------------------------------------------|
| Fresh   | 46.65% : 53.35%                                                     | Fresh                          | 41.83% : 58.17%                                                     |
| pH 6.0  | 51.83% : 48.17%                                                     | pH 6.0                         | 42.07% : 57.93%                                                     |
| pH 5.0  | 52.15% : 47.85%                                                     | pH 5.0                         | 42.15% : 57.85%                                                     |
